1 **Extreme Genomic Makeover: Evolutionary History of Maternally-transmitted**  
2 **Clam Symbionts**

3  
4 Short title:

5 Evolution of maternally-transmitted symbiont genomes

6  
7 M Perez<sup>1</sup>, C Breusing<sup>2</sup>, B Angers<sup>1</sup>, YJ Won<sup>3</sup>, and CR Young<sup>4</sup>

8  
9 <sup>1</sup> Department of Biological Sciences, Université de Montréal, Montreal, Canada

10 <sup>2</sup> Graduate School of Oceanography, University of Rhode Island, Narragansett, USA

11 <sup>3</sup> Division of EcoScience, Ewha Womans University, Seoul, South Korea

12 <sup>4</sup> National Oceanography Centre, Southampton, UK

13  
14  
15 Classification:

16 Evolution, Genetics, Microbiology, Selection, Recombination, Symbiosis, Genomics,  
17 Vesicomidae

18  
19  
20  
21 **Abstract**

22  
23 Given their recent switch to a vertically-transmitted intracellular lifestyle, the  
24 chemosynthetic bacteria associated with deep-sea vesicomid clams are an excellent  
25 model system to study the processes underlying reductive genome evolution. In this  
26 study, we provide the first estimates of the relative contributions of drift,  
27 recombination and selection in shaping the ongoing reductive genome evolution in  
28 these symbionts. To do so, we compared the genomes of endosymbionts associated  
29 with 11 vesicomid clam species to that of closely related free-living bacteria and  
30 their respective hosts' mitochondria. Our investigation confirmed that neutral  
31 evolutionary processes were the dominant driver of reductive genome evolution in  
32 this group and highlighted the important role of horizontal gene transfer in mitigating  
33 genome erosion. Finally, a genome-wide screen for episodic positive selection across  
34 the symbiont phylogeny revealed the pervasive role of selective processes in  
35 maintaining symbiont functional integrity.

36

## 37 Introduction

38 The evolution of biological complexity includes many examples of symbiotic  
39 associations. For example, the early evolution of the eukaryotic cell involved multiple  
40 endosymbiotic events leading to mitochondria and plastids<sup>1,2</sup>. More recent examples  
41 include associations of metazoans with intracellular bacteria<sup>3-6</sup>, including the well-  
42 studied associations of insects and *Buchnera* proteobacterial symbionts<sup>7</sup>. These  
43 associations have profound consequences for both host and symbiont, ranging from  
44 alterations of sex-ratio in insect hosts to providing nutrients that are otherwise  
45 unavailable in the host's habitat. Some intracellular symbionts are transmitted from  
46 parent to offspring of hosts through the germline (i.e. vertical transmission), while  
47 others are acquired from the environment every generation<sup>6</sup>. The mode of  
48 transmission strongly affects the evolution of the microbial partner in these symbioses,  
49 as the genomes of vertically transmitted symbionts all seem to follow the same  
50 process of reductive genome evolution (RGE) regardless of their phylogenetic origin,  
51 host, or habitat. Compared to their free-living counterparts, the genomes of host-  
52 restricted symbionts are smaller, contain fewer genes, and are enriched in AT<sup>8,9</sup>. A  
53 prime example is the genomes of cellular organelles such as mitochondria and  
54 plastids which are extremely streamlined compared to their bacterial cousins<sup>10</sup>.  
55 Symbiont genome evolution is thought to follow two main stages<sup>11</sup>. Following host  
56 restriction, symbionts undergo rapid genome erosion as they lose non-essential genes  
57 through pseudogenization and deletions<sup>12,13</sup>. Then, symbionts enter a "stabilizing  
58 phase". At this point, their genomes are streamlined, redundant genes and functions  
59 are lost<sup>14</sup>, and the effective rate of deletion diminishes<sup>15</sup>. This process might be  
60 largely neutral due to the reduced effective population size of host-restricted taxa.

61  
62 The pea aphid/*Buchnera* symbiosis and several other insect/bacteria models support  
63 the neutral hypothesis. Captured symbionts experience successive bottleneck events  
64 during their transmission that reduce their effective population size and increase  
65 genetic clonality. As a consequence, genetic drift increases relative to selection in  
66 these taxa<sup>16-18</sup>. Under these circumstances, elevated mutation load (i.e. the Muller's  
67 ratchet<sup>19</sup>) and genetic erosion might lead to the functional death of the symbiont  
68 lineage<sup>17,20-22</sup> unless compensating mechanisms such as gene transfer to the host  
69 nucleus or compensatory mutations alleviate the genetic load. Likewise, deep-sea taxa  
70 exhibit evidence of nearly neutral processes affecting evolutionary rates due to  
71 reduced population sizes in vertically transmitted symbionts<sup>23</sup>. Other  
72 metazoan/microbial symbioses highlight the importance of selection in shaping  
73 reductive genome evolution. For instance, symbiont traits that are beneficial for the  
74 host are likely to experience increased selective pressures, while selection may be  
75 relaxed on genes that are functionally redundant<sup>8</sup>. Red Queen dynamics are expected  
76 to occur in obligate symbioses to maintain the host-symbiont specificity and the  
77 functioning of cyto-nuclear interactions through speciation<sup>20</sup>. Unfortunately, the role  
78 of positive selection has often been ignored in studies of symbiont genome evolution  
79 and broad screens for positive selection have almost never been performed.

80  
81 The intracellular sulfur-oxidizing bacteria associated with deep-sea vesicomyid clams  
82 (*Bivalvia*: Vesicomyidae: Pliocardiinae) represent an ideal model to address the  
83 neutral and selective processes driving reductive genome evolution. The symbionts  
84 are found within the epithelial cells of their host's gills and provide them with  
85 chemosynthetically derived food. They are vertically transmitted to the next  
86 generation through the eggs<sup>24,25</sup> and generally show co-speciation with their hosts

87 <sup>26,27</sup>. It is assumed that symbiont capture in these animals was a single event that,  
88 based on fossil and molecular information, happened before their radiation about 45  
89 Mya <sup>28</sup>, an acquisition that is much more recent than that of other well-studied models  
90 such as the aphid/*Buchnera* (~ 200 Mya <sup>29</sup>) and nematode/*Wolbachia* (~100Mya <sup>30</sup>)  
91 symbioses. Today, the hosts represent the most diverse group of deep-sea bivalves <sup>31</sup>,  
92 with 173 described species present in a variety of reducing habitats worldwide from  
93 hydrocarbon seeps on continental margins to hydrothermal vents on mid-ocean ridges  
94 <sup>32-34</sup>. A comparative study of the first two sequenced vesicomid symbiont genomes  
95 <sup>35,36</sup> indicated that they possessed intermediate genome sizes and level of AT  
96 enrichment compared to other host-restricted symbionts <sup>11</sup>. The symbionts of deep-sea  
97 vesicomid clams group into two divergent clades: Clade I (associated with hosts of  
98 the *gigas* group), and Clade II (associated with all other lineages of vesicomid hosts)  
99 <sup>37</sup>. The genomic characteristics of Clade I symbionts indicate that this group is in an  
100 advanced state of reductive genome evolution compared to Clade II. However, in  
101 contrast to the well-studied pea aphid/*Buchnera* association, which has been in a state  
102 of stasis for 50 Myrs <sup>38</sup>, the evolutionary processes responsible for remodeling the  
103 genomes of vertically transmitted symbionts appear to be still operating in the  
104 vesicomid clam symbiosis. Conspicuous bottlenecks during transmission <sup>25</sup> and loss  
105 of DNA repair genes in several lineages <sup>37</sup> suggest that neutral processes and  
106 mutational pressures are driving RGE in vesicomid symbionts, although this  
107 hypothesis has not been formally tested.

108  
109 In this study, we aim to assess the relative contribution of neutral and selective  
110 processes to genome evolution in the maternally transmitted symbionts of deep-sea  
111 vesicomid clams. Specifically, we test the hypotheses that genetic drift is the main  
112 driver of RGE in these symbionts and that diversifying selection has shaped their  
113 genome to maintain host-symbiont epistasis throughout the evolutionary history of the  
114 symbiosis. To do so, we applied comparative methods to the symbiont genomes of 11  
115 vesicomid deep-sea clam taxa representative of the diversity of Clade I and Clade II,  
116 the mitochondrial genomes of their respective hosts, and two of their close free-living  
117 relatives: the environmentally acquired gill symbiont of the hydrothermal vent mussel  
118 *Bathymodiolus thermophilus* and the free-living bacteria of the SUP05 group, which  
119 are marine chemoautotrophic Gammaproteobacteria found in hypoxic waters <sup>39,40</sup>.  
120  
121

## 122 Results

### 123 *Host mitochondrial and symbiont phylogenies*

124 Host mitochondrial genomes from the lineages examined in this study possess  
125 identical gene orders and contents as previously published mitochondrial genomes  
126 <sup>41,42</sup>. The phylogeny constructed with mitochondrial genome data (Figure 1A) is  
127 congruent with the known host phylogenetic relationships based on multilocus  
128 sequence data and the *COI* phylogeny <sup>31</sup>. Structural variation is, however, present. We  
129 observe the previously described noncoding structural variation, hypothesized to be  
130 the control region, between the *tRNA<sup>Trp</sup>* or *tRNA<sup>His-2</sup>* and *ND6* loci <sup>41-43</sup> but we were  
131 unable to resolve this region with the current sequence data. We also found the *COX2*  
132 gene varies in length among taxa (range: 1005-1452bp). All protein-coding genes in  
133 the mitochondrial genomes were screened for selection using the adaptive branch-site  
134 random effects likelihood method. Interestingly, the *COX2* gene exhibited evidence  
135 for episodic diversifying selection on multiple branches of the phylogeny.

136  
137 Genome size and GC content for the 11 symbiont assemblies in our study varied from  
138 1.02Mb to 1.59 Mb and 31% to 37% GC, respectively (Table 1). The number CDS  
139 ranged from 939 in *Ca. V. okutanii* to 2210 in *Ca. R. phaseoliformis*. Following initial  
140 nomenclature, the symbiont lineages are referred to by the previously erected genera  
141 for this group, *Candidatus Vesicomysocius* for Clade I, and *Candidatus Ruthia* for  
142 Clade II symbionts, followed by host species names <sup>35,36,44</sup>. This classification at the  
143 genus level is coherent with both the phylogenetic definition based on 16S identity  
144 (inter-genus identity < 95% <sup>45</sup>) and functional definition based on criteria of genetic  
145 isolation <sup>46</sup> (see Symbiont genome structure and recombination)

146  
147 Examination of the mitochondrial and symbiont phylogenies (Figure 1) shows good  
148 concordance for all lineages except one. The symbiont lineages of *Ca. V. diagonalis*  
149 and *Ca. V. extenta* are nearly identical whereas their respective host mitochondrial  
150 lineages are divergent. The donor lineage in this recent symbiont replacement appears  
151 to be *A. diagonalis*. It is noteworthy that these clams were both collected from sites in  
152 Monterey Canyon. Pairwise comparison of mitochondrial and symbiont genome-wide  
153 synonymous divergence indicates faster evolutionary rates in the mitochondria  
154 compared to the symbionts in almost every holobiont pair (Figure 2). Within the  
155 symbionts, we detect signatures of elevated substitution rates on the branch leading to  
156 Clade I: the symbiont pairs across the Clade I- Clade II bipartition have significantly  
157 higher divergence than the others even when controlled for host divergence ( $1 < dS_{\text{mito}} < 2$ ).  
158  
159

### 160 *Symbiont genome structure and recombination*

161 Free living bacteria associated with *B. thermophilus* and *Ca. T. autotrophicus* shared  
162 about 1 Mbp of their genomes with the clam symbionts. Permutation analysis of  
163 locally collinear blocks (i.e. long fragments of aligned genomes) with GRIMM  
164 (<http://grimm.ucsd.edu/cgi-bin/grimm.cgi>) showed that at least 18 inversion events  
165 occurred between the genome of the *B. thermophilus* symbiont and that of the *Ca. R.*  
166 *magnifica* reference. Fewer rearrangements (3 inversions) were observed between  
167 SUP05 and *Ca. R. magnifica*.

168

169 Genome structure among the clam symbionts was also variable (Figure 1B). The  
170 previously reported *Ca. V. okutanii* genome<sup>36</sup> possesses one inversion compared to  
171 that of *Ca. R. magnifica*<sup>35</sup> but that of *Ca. V. okutanii*'s closest relative, *Ca. V. soyoae*,  
172 does not. The genomes of *Ca. R. pacifica* and *Ca. R. rectimargo* share a single  
173 inversion distinct to that of *Ca. V. okutanii*. Two other inversions were found in the  
174 *Ca. V. gigas* genome. Finally, read-mapping to the consensus assemblies for *Ca. R.*  
175 *phaseoliformis* and *Ca. R. southwardae* suggested the presence of intra-host structural  
176 variation in these symbionts.

177  
178 Applying Bayesian concordance analysis to all core protein-coding genes, we detect a  
179 large amount of recombination among symbiont lineages, though recombination is not  
180 randomly distributed. We observe no recombination between members of Clade I and  
181 II, but recombination is occurring within these genera (Figure 1B). Strikingly, much  
182 less topological concordance was found in Clade II – more than 40 different  
183 topologies were necessary to fully represent the diversity of conflicting phylogenetic  
184 signals – compared to that of Clade I whose phylogeny was fully represented by 5  
185 different trees. Within Clade I, conflict originates from the uncertainty of the position  
186 of *Ca. V. gigas*. Only 50% of the genes support its position in the phylogenetic tree  
187 issued from the concatenated core genome alignment (Figure 1B). Other well  
188 supported positions for this species are at the base of the clade (supported by 27% of  
189 genes) and closer to the group composed of *Ca. V. soyoae* and *Ca. V. okutanii*  
190 (supported by 20% of genes). Within Clade II, only the grouping of the sister species  
191 *Ca. R. rectimargo* and *Ca. R. pacifica* is supported by the topologies of all genes  
192 while the positions of other species have low support.

193

#### 194 ***Gene conservation across symbionts and free-living bacteria***

195 *Genes of free-living and horizontally-transmitted bacteria missing in vesicomylid*  
196 *symbionts*

197 The genomes of the free-living bacteria contained many large (> 5kb) contiguous  
198 sections that were not found in the symbionts. These genomic islands were mostly  
199 composed of unannotated genes and mobile elements (transposases, integrases,  
200 prophage genes) (Table S1). We found more selfish genetic elements in the genome  
201 of the *Bathymodiolus* symbiont than in that of SUP05. The genomic islands found in  
202 the two genomes also encoded several gene clusters of particular functional interest  
203 described below.

204

205 Unsurprisingly for a bacterium living in a metal-rich hydrothermal environment, the *B.*  
206 *thermophilus* symbiont genome possesses genes for resistance against heavy-metal  
207 toxicity such as a multi-copper oxidase (*mmcO*), a copper ion exporting ATPase  
208 (*copB*), cobalt-zinc-cadmium resistance proteins (*czcD* and *czcCBA*), and a chromate  
209 transport protein (*chrA*). The genomic islands of the mussel symbiont also carried full  
210 operons for three different defense systems; a type I restriction and modification  
211 system (*hsdRMS*), a CRISPR-Cas type II system (*cas9*, *cas1*, *cas2*, *cas4*), and a type  
212 II toxin-antitoxin system (*vapCB*). Finally, this genome possesses a 23kb hydrogenase  
213 operon that has 83% and 82% identity to that of the symbionts of *Bathymodiolus*  
214 *septemdierum*<sup>47</sup> and *B. puteoserpentis*<sup>48</sup>, respectively. The representative SUP05  
215 genome contained a 21kb motility locus, comprising a type IV pilus biogenesis  
216 operon (*pilA*, *pilB*, *pilC*, *pilT*, *pilQ*, *pilY1*), and a toxin-antitoxin locus (*higAB*), that  
217 was not found in the other genomes. Furthermore, this genome possessed two



218 additional smaller genomic islands (6kb and 15 kb) encoding a nitric oxide reductase  
219 (*norCBQD*), and a periplasmic nitrate reductases (*napAB*), respectively, which  
220 clustered with sulfur covalently binding protein genes (*soxYZ*).

221

#### 222 *Gene content in vesicomylid symbionts*

223 The symbionts of Clade I and Clade II possessed essentially a subset of the genes  
224 found in the free-living lineages. Indeed, sequence-based comparisons of free-living  
225 lineages to the symbionts revealed that many genes present only within the symbiont  
226 lineages are hypothetical genes with unknown function resulting from the  
227 degeneration of ancestral genes, as indicated by premature stop codons, frameshifts,  
228 and loss of neighboring genes (Table S1). These pseudogenes were more prevalent in  
229 the genomes of Clade I than Clade II symbionts. In many instances, homologous  
230 regions within the Clade I symbiont genomes were instead characterized by large  
231 deletions. In general, patterns of gene decay were more variable within Clade II than  
232 Clade I. Genes were overall more conserved within *Ca. R. southwardae*, *Ca. R.*  
233 *phaseoliformis* and *Ca. R. pliocardia* than in other lineages. Among the *Ca. Ruthia*  
234 symbionts, gene degeneration was most pronounced in *Ca. R. magnifica*, which  
235 possessed a conservation pattern closer to that of the Clade I lineages (Figure S1B).

#### 236 *Genome-wide pattern of relaxed selection*

237 Codon usage bias was reduced in the symbiont lineages compared to their free-living  
238 relatives. Furthermore, symbionts in Clade I showed reduced bias and variance  
239 compared to Clade II (Figure 3A). The CDC values of core protein-coding genes were  
240 significantly correlated between lineage pairs both at the clade and species level  
241 (Pearson's test p-value <0.001; Figure 3B, Table S2), suggesting that the reduction in  
242 codon usage bias in the vertically transmitted symbionts result from a genome-wide  
243 reduction of the efficacy of purifying selection.

244 RELAX analysis revealed intensified selection in the vesicomylid symbionts  
245 compared to free-living bacteria for less than 5% of the core orthologous genes, while  
246 relaxed selection was detected in more than half of the core gene set (Figure 3C,  
247 Table S3). The magnitude of relaxation ( $k < 1$ ) was in the range of that observed in  
248 insect endosymbionts<sup>49</sup> but was not correlated to codon bias. Genes exhibiting  
249 intensified and relaxed selection represented a multitude of metabolic functions, but  
250 genes under relaxed selection were enriched in the protein metabolism, nucleoside  
251 and nucleotides, and DNA metabolism categories while genes under intensifying  
252 selection were more likely to be associated with respiration, cell wall and capsule, and  
253 sulfur metabolism. However, we did not find increased relaxation in the symbionts of  
254 Clade I compared to Clade II. Indeed, fewer genes exhibited significant change in  
255 selection pressure (intensified or relaxed) between these groups than between  
256 symbionts and free-living bacteria, and about the same proportion of genes under  
257 relaxed and intensified selection was found in both clades.

258

#### 259 *Genome-wide screen for positive selection*

260 The symbiont genes that passed the inclusion criteria to be screened for selection (see  
261 methods) included 652 loci. The application of the adaptive BS-REL method yielded  
262 223 genes with significant evidence for episodic diversifying selection along branches  
263 in the phylogeny. Selection is distributed throughout the evolutionary history of the  
264 group (Figure S1A, and Table S4) with most selection occurring on the branches  
265 discriminating free-living bacteria, Clade I, and Clade II (branches a, b, and c in

266 Figure 4), as well as within the *B. thermophilus* symbiont and SUP05 lineage (43 and  
267 37 genes, respectively). Eighty-five percent of the loci that exhibited unequivocal  
268 evidence of selection was assigned to SEED categories (Figure 4, Table S5). Within  
269 each clade and along each of the main branches, these selected loci were not equally  
270 represented amongst cellular functions of the core genome (hypergeometric tests p-  
271 values < 0.001). Genes in overrepresented functional categories are presented in Table  
272 2. The complete list of selected genes is available in Table S4.

273

#### 274 *Selection within free-living bacteria*

275 Amongst the free-living lineages, a larger than expected number of genes associated  
276 with protein metabolism, respiration, and sulfur metabolism were under selection  
277 (Fisher tests p-value < 0.05). These included genes involved in ribosome assembly, t-  
278 RNA biogenesis, protein folding, oxidative phosphorylation, sulfur oxidation, and  
279 dissimilatory sulfate reduction. On the bipartition between the free-living and  
280 symbiont groups, additional genes associated with protein metabolism were positively  
281 selected, including ribosomal protein genes, and the t-RNA ligase genes.

282

#### 283 *Selection within symbionts*

284 Many genes coding for chaperones, ribosomal proteins, and t-RNA ligases were under  
285 selection within the symbiont phylogeny. In addition, we found evidence for selection  
286 in metabolic genes that are central to the chemosynthetic role of these symbionts.  
287 Several genes involved in sulphur metabolism (i.e. *dsrA*, *dsrP*, *soxB*, *cobB-cbiA/dsrN*)  
288 and electron donating/accepting reactions were under selection. Two genes involved  
289 in ammonia assimilation (*gltB*, and *glnD*) also exhibited evidence of selection within  
290 both symbiont clades. Within Clade II and along the branch partitioning this group,  
291 there was an over-representation of selected genes involved in *de novo* purine and  
292 pyrimidine biosynthesis, carbon fixation, and DNA recombination and repair.  
293 Selection within Clade I favored additional genes broadly associated with DNA  
294 metabolism. Notably, 60 genes showed evidence for positive selection in multiple  
295 branches of the phylogeny, including 44 genes within the symbiont phylogeny. These  
296 genes were mostly associated with protein metabolism.

297

## 298 **Discussion**

### 299 ***Reductive genome evolution is still ongoing in the clam symbionts and is driven by*** 300 ***neutral processes***

301 Comparative analyses of the first two reference genomes of vesicomid clam  
302 endosymbionts revealed variation in genome structure, genome characteristics, and  
303 genome composition between distantly-related symbiont species<sup>11</sup> suggesting that  
304 RGE might still be ongoing in this group. Our results confirm these early findings and  
305 reveal additional genomic variation among the deeply diverging lineages. These  
306 findings expand the ranges of genome size, genome content and GC% considerably.

307

308 As in other models of recently acquired bacteria<sup>22,50</sup>, gene content differed greatly  
309 between vesicomid symbiont genomes indicating that the different lineages are  
310 independently losing genes. The presence of structural variation and putative  
311 pseudogenes (Figure S2) within the vesicomid symbiont genomes suggest that these  
312 symbionts have not yet reached a stable streamlined state as those of the *Buchnera* or  
313 *Paulinella* symbionts<sup>15,38</sup>. Comparing the clam symbionts to their free-living relatives  
314 revealed reduced GC%, a reduction in codon usage bias, pseudogenization, and

315 evidence for reduced purifying selection in the vast majority of genes. Taken together,  
316 these observations support the nearly neutral theory of RGE, driven by a reduction of  
317 effective population size in these taxa.

318  
319 Finally, in agreement with the findings of Stewart et al.<sup>27,51</sup>, Decker et al.<sup>52</sup>, and  
320 Ozawa et al.<sup>53</sup>, we detected no recombination between Clade I and II symbionts even  
321 though some of the host taxa co-occur<sup>54-56</sup>. These findings imply that there is enough  
322 molecular and ecological divergence between the two clades for clonal interference  
323 and/or strong host-symbiont epistatic interactions to constrain symbiont exchange<sup>20,52</sup>.  
324 Thus, our results support the nomenclature initially put forward by Newton *et al.*<sup>35</sup>  
325 and Kuwahara *et al.*<sup>36</sup> classifying the symbionts from Clade I and II into two distinct  
326 bacterial genera, *Ca. Vesicomysocius* and *Ca. Ruthia*. For clarity, we will keep  
327 referring to these two genera as Clade I and Clade II in the rest of the discussion.

### 328 ***Reductive genome evolution is exacerbated in non-recombining symbionts***

329 Clade I symbionts are in a more advanced state of RGE than the others. Indeed,  
330 compared to Clade II, their genomes are smaller and lower in GC%, possess fewer  
331 genes and pseudogenes, and exhibit less codon usage bias. The genomes of Clade I  
332 symbionts are also more homogeneous. Patterns of gene conservation suggest that  
333 much of the loss in this group happened after its speciation but before its radiation, a  
334 period of roughly 20Mys<sup>26,31</sup>. Together with increased substitution rate on its  
335 diverging branch these results show that the ancestral Clade I lineage experienced an  
336 episodic acceleration of reductive genome evolution. It is likely that the increased  
337 level of genome reduction in Clade I results from a reduction of homologous  
338 recombination in the ancestor of the group exacerbating Muller's ratchet<sup>57</sup>. Drift-  
339 driven loss of recombination machinery may have strongly reduced the rate of genetic  
340 exchange among the symbionts in this genus. Indeed, essential genes of the RecF and  
341 RecBCD pathways for homologous recombination appear to be lost in all of the Clade  
342 I symbionts<sup>37</sup> and while horizontal transfer of genetic material is widespread among  
343 symbionts within Clade II it is almost absent in Clade I.

344  
345 Strong linkage disequilibrium forces whole genomes to sweep in populations that lack  
346 genetic exchange capabilities. Hence, the loss of homologous recombination genes  
347 should favor symbiont replacement in cases where the divergence between “native”  
348 and foreign symbionts is low (i.e. when the foreign symbionts are not too easily  
349 outcompeted by those that have co-evolved with the host). In fact, we find multiple  
350 examples of symbiont replacement among symbionts of Clade I. For instance,  
351 individual clams of the species *P. extenta* have acquired the symbionts of the  
352 sympatric species *A. diagonalis*. Likewise, Breusing et al.<sup>56</sup> found a population of *A.*  
353 *gigas* carrying the symbionts of the host species *P. soyoae*. Symbiont replacement  
354 occurs in several vertically transmitted symbioses<sup>58-61</sup> and is speculated to constitute  
355 a mechanism for escaping the evolutionary rabbit hole caused by Muller's ratchet  
356<sup>20,58,62</sup>. The present data support this notion, and future population genomic studies  
357 could determine the prevalence of symbiont replacement and relative rates of  
358 recombination in these taxa on more recent time scales.

359  
360 Despite the lack of recombining machinery in Clade I, one lineage in this genus, *Ca.*  
361 *V. gigas*, showed evidence for recombination. It is puzzling how recombination might  
362 be occurring in this species. Breusing et al.<sup>56</sup> recently found evidence of  
363 unidirectional introgression from *P. soyoae* into *A. gigas*. This mechanism might



364 enable *A. gigas* symbionts to come into contact with other symbionts. Perhaps the  
365 recombination in this species is enabled via host-encoded proteins<sup>63</sup>. Transfer of  
366 symbiont genes to the host nuclear genome is possible and should be investigated in  
367 future studies. Indeed, evidence for such transfer was recently found by Ip *et al.*<sup>44</sup>  
368 who identified *Bathymodiolus* symbiont gene homologs in the genome of the *A.*  
369 *marissinica*.

### 370 ***Putative ecological and evolutionary consequences of RGE***

371 The Muller's ratchet has been hypothesized to lead to a progressive loss of fitness in  
372 host restricted symbionts<sup>20</sup>. Sympatric populations of symbionts from Clade I and II  
373 represent an excellent model to test this hypothesis because of their contrasting  
374 reductive stages. For instance, comparisons of the sulfide physiology of the host  
375 species *P. soyoae* and *C. pacifica*, which occupy different micro-niches in the same  
376 habitat, reveal that *P. soyoae* individuals have lower sulfide oxidation capacities than  
377 those of *C. pacifica*<sup>55</sup>. This could be the consequence of a less efficient sulfide  
378 metabolism in *Ca. V. soyoae* resulting from a more advanced state reductive genome  
379 evolution in this species compared to *Ca. R. pacifica*. If RGE in the symbionts can  
380 restrict their host's ecological range, contrasting degrees of RGE may put constraints  
381 on the potential for genetic exchange across different holobiont species and even  
382 promote speciation<sup>20</sup>. Future observational and experimental studies could help  
383 define the evolutionary constraints imposed by both host and symbiont physiology  
384 and clarify the role of reductive genome evolution in niche partitioning and speciation.  
385

### 386 ***Selective processes in the evolutionary history of the symbionts***

387 Contrasting patterns of gene conservation between the symbionts and their free-living  
388 relatives are caused by a shift in selective regime in the host-associated bacteria.  
389 Genes enabling bacteria to face the challenges of a free-living environment, such as  
390 detoxification, anti-viral defense and inter-species competition, were not conserved in  
391 the vesicomid clam symbionts. Furthermore, different patterns of pseudogenization  
392 in Clade I and Clade II likely translate to different physiological adaptations at the  
393 level of the holobiont. For example, Breusing *et al.* [in review] found that the two  
394 vesicomid symbiont clades show enzymatic differences related to sulfide oxidation  
395 and nitrate reduction and have contrasting dependencies on nickel and vitamin B12 in  
396 accordance with adaptations to different ecological niches. In addition, episodes of  
397 diversifying selection on genes associated with respiration, ammonia assimilation, and  
398 chemosynthesis might reflect the constraints imposed by the diverse selective  
399 pressures of host physiology throughout their radiation and niche expansion.

400  
401 Selective constraints are expected to affect genes involved in host-symbiont  
402 interactions. Interspecific communication between eukaryotes and microbes generally  
403 involve molecules with distinct motifs produced by the symbiont (e.g., Nod factors,  
404 lipopolysaccharides, or peptidoglycans) that are sensed by special receptor in the host  
405<sup>64,65</sup>. These molecular pathways must experience reciprocal adaptations to persist  
406 through speciation and niche expansion. Diversifying selection acting on genes  
407 involved in the mediation of host-symbiont interactions such as lipopolysaccharides  
408 and peptidoglycans was observed in divergent clades of *Wolbachia*<sup>66</sup> and many  
409 facultative endosymbionts<sup>67</sup>. In a recent study, Chong *et al.*<sup>68</sup> performed a genome-  
410 wide screen for selection in the *Buchnera* symbionts from the aphid subfamily  
411 Aphidinae. Of the 371 protein-coding genes tested, the authors detected 29 positively

412 selected genes representing a variety of metabolic functions including two outer  
413 membrane porins (OmpF and OmpA), which are assumed to be important for host  
414 interaction.

415  
416 Surprisingly, in the clam symbionts, we did not detect selection on proteins associated  
417 with host-symbiont interactions but found instead a pervasive pattern of diversifying  
418 selection that affected many loci related to housekeeping functions such as DNA and  
419 RNA metabolism, transcription and translation. Many ribosomal proteins and  
420 chaperones showed evidence for episodic positive selection repeatedly throughout the  
421 symbiont phylogeny. These results could indicate that the accumulation of slightly  
422 deleterious mutations in the symbiont genomes initiates a selective pressure for  
423 compensatory mutations<sup>69,70</sup>. Evidence for such mutations exist in several organelles  
424 and symbiont models<sup>70-73</sup>. For instance, in insect endosymbionts, positively selected  
425 loci of the chaperonin GroEL are suspected to permit better protein binding and allow  
426 proper protein folding despite mutations affecting their conformation<sup>71</sup>. Alternatively,  
427 these signatures of selection might be in response to other generalized selection  
428 pressures such as differences in host habitat (e.g., depth). However, the host  
429 mitochondria do not overall seem to be similarly affected making this alternative less  
430 likely. Regardless, the pervasive nature of episodic diversifying selection at the level  
431 of amino acids in the symbiont genomes suggests that increased drift due to effective  
432 size reduction is not the sole driver of molecular evolution in these taxa.

433

#### 434 **Conclusion**

435 The vertically transmitted symbionts of deep-sea vesicomid clams are an ideal model  
436 to study the processes of reductive genome evolution, as they constitute a highly  
437 diverse group of host-restricted bacteria with varying degrees of genomic reduction.  
438 We show that both neutral and selective processes have played a role in the  
439 evolutionary history of these symbiont and that factors affecting their clonality have  
440 strongly influenced the rate of genome evolution. While the vesicomid clams have  
441 yet to be successfully bred in aquaria, significant progress has been made towards  
442 their cultivation<sup>74</sup>. Examination of the symbionts at the population-level, both within  
443 and across individual hosts, will help to decipher the contributions of host physiology,  
444 genetic drift, symbiont fitness, cytonuclear incompatibilities, and horizontal gene  
445 transfer to their evolution. Additionally, experimental studies on host-symbiont  
446 interactions and holobiont metabolism will shed further light onto the role of these  
447 symbionts in the ecological partitioning of their hosts.

448

#### 449 **Acknowledgements**

450 The Monterey Bay Aquarium Research Institute kindly provided samples from the  
451 Vrijenhoek collection for this study. We thank the ships' crews and submersible pilots  
452 involved in the collections for this study, without whose efforts this work would not  
453 have been possible. N. Pratt and A. Baylay contributed to sequencing at the National  
454 Oceanography Centre Genomics Facility. This work was supported by NERC  
455 National Capability funding. MP acknowledges the support of the National Science  
456 and Engineering Research Council (NSERC) of Canada's Alexander Graham Bell  
457 graduate scholarship and Michael Smith Foreign Study Supplements. CB's  
458 contribution was supported through a postdoctoral fellowship of the German Research  
459 Foundation (BR 5488/1-1) and a grant from the United States National Science  
460 Foundation awarded to CB's mentor Roxanne Beinart at the University of Rhode

461 Island (OCE-1736932). BA acknowledges support from NSERC research grant  
462 #238600. The genome of *Bathymodiolus thermophilus* was sequenced as part of a  
463 project titled ‘Understanding the deep-sea biosphere on seafloor hydrothermal vents  
464 in the Indian Ridge (No. 20170411)’ funded to YJW by the Ministry of Oceans and  
465 Fisheries, Korea.  
466

## 467 **Materials and Methods**

### 468 ***Sample collection and sequencing***

469 Host taxa examined in this study were chosen from the deepest diverging lineages  
470 within the Vesicomidae that are distributed globally in the northern hemisphere  
471 (Figure S3) and are representative of the known host diversity<sup>31</sup>. Specimens of nine  
472 clam species were collected between 1996 and 2004 over eight research expeditions  
473 (Table 3, Figure S3). Depths of sampling locations ranged from 650–3550m. Samples  
474 were dissected aboard ship and then frozen at -80C or were frozen whole at -80C.  
475 DNA was extracted from symbiont bearing gill tissue using the DNeasy Blood &  
476 Tissue extraction kit (Qiagen, Hilden, Germany) following the manufacturer's  
477 protocol. Host species identification was initially confirmed by sequencing the host  
478 mitochondrial *COI* gene using vesicomid-specific primers<sup>28</sup>.

479  
480 Mixed host and symbiont DNA samples were sequenced in-house on a MiSeq  
481 instrument. Genomic DNA libraries were prepared using the KAPA Hyperplus  
482 Library Preparation kit (KAPA Biosystems, Wilmington, MA, US) according to kit  
483 instructions. Read quality of genomic data was assessed using FastQC<sup>38</sup>.

484

### 485 ***Mitochondrial and symbiont genome reconstruction and annotation***

486 Initial symbiont and mitochondrial assemblies were constructed from the same  
487 metagenomic libraries (Table 3) using Velvet<sup>76</sup>, manually optimizing for *k*-mer size  
488 distribution and read depth. Some assemblies were also constructed using the read  
489 mapping and assembly functions in Geneious version 10.1.3<sup>77</sup>.

490

491 Scaffolding and circularization of the symbiont genomes were performed by mapping,  
492 extracting and reassembling reads mapping to the extremities of contigs using  
493 Bowtie2<sup>78</sup>, Samtools<sup>79</sup> and SPAdes<sup>80</sup>, respectively. Mitochondrial genomes were  
494 assembled de novo with MITObim<sup>81</sup> using as seed a set of initial contigs constructed  
495 using the read mapping and assembly functions in Geneious version 10.1.3<sup>77</sup>.  
496 Mitochondrial genome annotations were produced by the GeSeq application<sup>82</sup> using  
497 ARWEN v1.2.3 for tRNA prediction, and manually curated with the aid of previously  
498 annotated mitochondrial genomes<sup>41,42</sup> in Geneious. Mitogenome assembly statistics  
499 are presented in Table S6. The symbiont genomes were annotated in RAST<sup>83</sup>.

### 500 ***Structural variation and phylogenomic analyses***

501 Host mitochondrial and symbiont genomes were aligned with Progressive Mauve<sup>84</sup>.  
502 Progressive Mauve and GRIMM (<http://grimm.ucsd.edu/cgi-bin/grimm.cgi><sup>85</sup>) were  
503 used to identify large-scale structural differences among genomes. Locally collinear  
504 blocks (LCBs) longer than 100bp and found in all genomes were extracted with  
505 Mauve's stripSubsetLCBs program, aligned with Mafft<sup>86</sup> and concatenated into host  
506 mitochondrial and bacterial core genomes. Phylogenetic trees were produced from  
507 these core genomes using the GTR model and 100 bootstraps in PhyML-3.1<sup>87</sup>.

508

509 We compared host and symbiont evolutionary rates by estimating the divergence at  
510 synonymous sites for each host pair. Using the Biopython toolkit<sup>88</sup>, we extracted the  
511 nucleic and amino acid sequences of 13 conserved mitochondrial and 718 bacterial  
512 core protein-coding genes (see below). Amino acid sequences were then aligned with  
513 Muscle<sup>89</sup> and reverse translated into codon alignments using the "build" function

514 from the Biopython codonalign package. The mitochondrial and bacterial codon-  
515 based alignments were then each concatenated into two genome-wide alignments with  
516 complete (no gaps, no N) lengths of 10417 bp and 662118 bp, respectively. We  
517 assessed substitution saturation by plotting transitions and transversions against  
518 adjusted genetic distance. Pairwise synonymous (dS) substitution rates were  
519 computed using the Maximum-Likelihood method<sup>90</sup> implemented in the Biopython  
520 codonalign package. The source code was slightly modified to accommodate for  
521 ambiguous bases in the mitochondrial genomes.

### 522 ***Identification of bacterial core genes***

523 Because of low structural differences among genomes, orthologous genes could be  
524 inferred based on homology and position<sup>91</sup>. A list of positional homologs with a  
525 minimum identity of 30% and a minimum coverage of 60% was exported from the  
526 Mauve alignments. Additional maps with a stricter identity criterion (60% identity, 80%  
527 coverage) were produced from the alignments of multiple subsets of symbiont  
528 genomes. The consensus of these orthologous maps yielded 749 core genes (Figure  
529 S2, Table S1) including 718 core protein-coding genes ranging from 138 bp to 4554  
530 bp (average 975bp) (Table S3).

531

### 532 ***Bayesian concordance analyses***

533 We used Bucky v.1.2<sup>92</sup> to estimate the proportion of core protein-coding genes  
534 supporting each topology. Putative recombination breakpoints within the 718 core  
535 protein-coding genes previously found were identified with GARD and the KH test  
536<sup>93,94</sup>. Using a false positive discovery rate threshold of 5%, recombination was found  
537 in 66 genes which were thus split into multiple contiguous non-recombining gene  
538 segments at the inferred breakpoints prior to phylogenetic inference.

539 Bucky takes as input the posterior distribution of topologies for each gene (or gene  
540 segment). These distributions were each obtained from 800 trees generated in  
541 MrBayes v.3.2.7a<sup>95</sup> using a Gamma + I rate variation across sites. These trees  
542 represented a well-mixed sample of the tree space after convergence of four  
543 independent Markov Chain Monte Carlo (MCMC) chains which were each run for  
544 2,000,000 generations after an initial 100,000 generations burn-in period. Trees were  
545 sampled every 10,000 generations to avoid autocorrelation. Parameter optimization  
546 for the MCMCs was performed by assessing convergence and mixing of both  
547 continuous parameters of the model and tree topologies using the R package RWTY  
548 v.1.0.2<sup>96</sup>.

549 In Bucky, two independent MCMC runs were carried out using the prior assumption  
550 that all genes shared the same topology (alpha=0). MCMC runs performed 1,000,000  
551 updates after an initial 10% burn-in period. One cold and three heated chains  
552 (swapping frequency =10) were used to improve mixing and convergence of all of the  
553 MCMC runs.

554

### 555 ***Relaxed and positive selection detection***

556 Relaxation of the strength of selection was detected in the symbiont genomes by two  
557 independent methods. First we use the Codon Deviation Coefficient (CDC)<sup>97</sup> to  
558 quantify codon usage bias on all protein-coding genes (Table S2) because this index  
559 does not require a priori knowledge of gene expression and is not biased by GC  
560 content. Second, we used RELAX<sup>49</sup> on individual core genes. RELAX detects



561 change in the strength of selection between two groups by observing change in the  
562 distribution of  $\omega$  (dN/dS ratio) classes in a branch-site random effects likelihood (BS-  
563 REL) framework between a set of test and reference branches. We compared *Ca.*  
564 *Vesicomysocius*, *Ca. Ruthia*, and both clades together to the group composed of the  
565 free-living lineages.  
566 To reduce false positives in phylogenetic selection tests<sup>98</sup>, genes with significant  
567 evidence of recombination (see Bayesian concordance analyses) were excluded from  
568 these analyses. Episodic diversifying selection on individual lineages was identified  
569 on the remaining non-recombining 652 protein-coding genes using the adaptive  
570 Branch-site Random Effects Likelihood method (aBSRel<sup>99</sup>). The Holm-Bonferroni  
571 correction for multiple testing was applied and threshold for detection was set to 10%  
572 false positive discovery rate. We used the hypergeometric test function *dmvhyper*  
573 from *extraDistr* v.1.8.11<sup>100</sup> to test whether the genes under relaxed or positive  
574 selection represented a random subsample of all core genes according to SEED  
575 categories<sup>83</sup>. The Fisher test<sup>101</sup> was applied to find SEED categories that were over-  
576 represented in the genes under relaxed or positive selection.  
577

578 ***Data availability***

579 Symbiont genomes and Sequence Read Archives (SRAs) are available at the National  
580 Center for Biotechnology Information (NCBI) under the BioProject PRJNA641445.  
581 The mitochondrial genomes were deposited in GenBank under the references  
582 MT947381-MT947391.

583  
584 Genome alignment files and Rmarkdown scripts of downstream analyses are available  
585 at [https://github.com/maepz/VesicSymb\\_Evolution](https://github.com/maepz/VesicSymb_Evolution)  
586

587 **Authors contributions**

588 CRY designed the study; CRY and YJW contributed to data collection; MP, CB, and  
589 CRY performed analysis, BA contributed to data interpretation. And all authors co-  
590 wrote the manuscript.

591

592 **Competing interests**

593 The authors declare no competing interests.

594 **References**

595

- 596 1. Roger, A. J., Muñoz-Gómez, S. A. & Kamikawa, R. The Origin and  
597 Diversification of Mitochondria. *Current Biology* **27**, R1177–R1192 (2017).
- 598 2. McFadden, G. I. Origin and Evolution of Plastids and Photosynthesis in  
599 Eukaryotes. *Cold Spring Harb Perspect Biol* **6**, a016105 (2014).
- 600 3. Cavanaugh, C. M. Microbial Symbiosis: Patterns of Diversity in the Marine  
601 Environment. *American Zoologist* **34**, 79–89 (1994).
- 602 4. Clavijo, J. M., Donath, A., Serôdio, J. & Christa, G. Polymorphic adaptations in  
603 metazoans to establish and maintain photosymbioses. *Biological Reviews* **93**,  
604 2006–2020 (2018).
- 605 5. Garate, L., Sureda, J., Agell, G. & Uriz, M. J. Endosymbiotic calcifying bacteria  
606 across sponge species and oceans. *Scientific Reports* **7**, 43674 (2017).
- 607 6. Bright, M. & Bulgheresi, S. A complex journey: transmission of microbial  
608 symbionts. *Nat Rev Micro* **8**, 218–230 (2010).
- 609 7. Baumann, P. *et al.* Genetics, physiology, and evolutionary relationships of the  
610 genus *Buchnera*: intracellular symbionts of aphids. *Annu. Rev. Microbiol.* **49**, 55–  
611 94 (1995).
- 612 8. Wernegreen, J. J. Endosymbiont evolution: predictions from theory and surprises  
613 from genomes. *Annals of the New York Academy of Sciences* **1360**, 16–35 (2015).
- 614 9. Fisher, R. M., Henry, L. M., Cornwallis, C. K., Kiers, E. T. & West, S. A. The  
615 evolution of host-symbiont dependence. *Nature Communications* **8**, 15973 (2017).
- 616 10. Husnik, F. & Keeling, P. J. The fate of obligate endosymbionts: reduction,  
617 integration, or extinction. *Current Opinion in Genetics & Development* **58–59**, 1–  
618 8 (2019).
- 619 11. Kuwahara, H. *et al.* Reductive genome evolution in chemoautotrophic  
620 intracellular symbionts of deep-sea Calyptogenia clams. *Extremophiles* **12**, 365–  
621 374 (2008).
- 622 12. Itoh, T., Martin, W. & Nei, M. Acceleration of genomic evolution caused by  
623 enhanced mutation rate in endocellular symbionts. *PNAS* **99**, 12944–12948 (2002).
- 624 13. Moran, N. A., McLaughlin, H. J. & Sorek, R. The Dynamics and Time Scale of  
625 Ongoing Genomic Erosion in Symbiotic Bacteria. *Science* **323**, 379–382 (2009).
- 626 14. Mendonça, A. G., Alves, R. J. & Pereira-Leal, J. B. Loss of Genetic Redundancy  
627 in Reductive Genome Evolution. *PLOS Computational Biology* **7**, e1001082  
628 (2011).
- 629 15. Lhee, D. *et al.* Evolutionary dynamics of the chromatophore genome in three  
630 photosynthetic *Paulinella* species. *Scientific Reports* **9**, 2560 (2019).
- 631 16. Wernegreen, J. J. & Moran, N. A. Evidence for genetic drift in endosymbionts  
632 (*Buchnera*): analyses of protein-coding genes. *Mol Biol Evol* **16**, 83–97 (1999).
- 633 17. Moran, N. A. Accelerated evolution and Muller’s ratchet in endosymbiotic  
634 bacteria. *PNAS* **93**, 2873–2878 (1996).
- 635 18. Kuo, C.-H., Moran, N. A. & Ochman, H. The consequences of genetic drift for  
636 bacterial genome complexity. *Genome Res.* **19**, 1450–1454 (2009).
- 637 19. Muller, H. J. The relation of recombination to mutational advance. *Mutation*  
638 *Research/Fundamental and Molecular Mechanisms of Mutagenesis* **1**, 2–9 (1964).
- 639 20. Bennett, G. M. & Moran, N. A. Heritable symbiosis: The advantages and perils of  
640 an evolutionary rabbit hole. *PNAS* **112**, 10169–10176 (2015).
- 641 21. Andersson, S. G. E. & Kurland, C. G. Reductive evolution of resident genomes.  
642 *Trends in Microbiology* **6**, 263–268 (1998).

- 643 22. Andersson, J. O. & Andersson, S. G. Genome degradation is an ongoing process  
644 in *Rickettsia*. *Mol Biol Evol* **16**, 1178–1191 (1999).
- 645 23. Peek, A. S., Vrijenhoek, R. C. & Gaut, B. S. Accelerated evolutionary rate in  
646 sulfur-oxidizing endosymbiotic bacteria associated with the mode of symbiont  
647 transmission. *Mol Biol Evol* **15**, 1514–1523 (1998).
- 648 24. Cary, S. C. & Giovannoni, S. J. Transovarial inheritance of endosymbiotic  
649 bacteria in clams inhabiting deep-sea hydrothermal vents and cold seeps. *PNAS*  
650 **90**, 5695–5699 (1993).
- 651 25. Ikuta, T. *et al.* Surfing the vegetal pole in a small population: extracellular vertical  
652 transmission of an ‘intracellular’ deep-sea clam symbiont. *Royal Society Open*  
653 *Science* **3**, 160130 (2016).
- 654 26. Peek, A. S., Feldman, R. A., Lutz, R. A. & Vrijenhoek, R. C. Cospeciation of  
655 chemoautotrophic bacteria and deep sea clams. *PNAS* **95**, 9962–9966 (1998).
- 656 27. Stewart, F. J., Young, C. R. & Cavanaugh, C. M. Evidence for homologous  
657 recombination in intracellular chemosynthetic clam symbionts. *Mol. Biol. Evol.*  
658 **26**, 1391–1404 (2009).
- 659 28. Peek, A. S., Gustafson, R. G., Lutz, R. A. & Vrijenhoek, R. C. Evolutionary  
660 relationships of deep-sea hydrothermal vent and cold-water seep clams (Bivalvia:  
661 Vesicomidae): results from the mitochondrial cytochrome oxidase subunit I.  
662 *Marine Biology* **130**, 151–161 (1997).
- 663 29. Moran, N. A., Munson Mark A., Baumann Paul & Ishikawa Hajime. A molecular  
664 clock in endosymbiotic bacteria is calibrated using the insect hosts. *Proceedings*  
665 *of the Royal Society of London. Series B: Biological Sciences* **253**, 167–171  
666 (1993).
- 667 30. Ferri, E. *et al.* New Insights into the Evolution of Wolbachia Infections in Filarial  
668 Nematodes Inferred from a Large Range of Screened Species. *PLOS ONE* **6**,  
669 e20843 (2011).
- 670 31. Johnson, S. B., Krylova, E. M., Audzijonyte, A., Sahling, H. & Vrijenhoek, R. C.  
671 Phylogeny and origins of chemosynthetic vesicomid clams. *Systematics and*  
672 *Biodiversity* **15**, 346–360 (2017).
- 673 32. Krylova, E. M. & Sahling, H. Vesicomidae (Bivalvia): Current Taxonomy and  
674 Distribution. *PLoS ONE* **5**, e9957 (2010).
- 675 33. Audzijonyte, A., Krylova, E. M., Sahling, H. & Vrijenhoek, R. C. Molecular  
676 taxonomy reveals broad trans-oceanic distributions and high species diversity of  
677 deep-sea clams (Bivalvia: Vesicomidae: Pliocardiinae) in chemosynthetic  
678 environments. *Systematics and Biodiversity* **10**, 403–415 (2012).
- 679 34. MolluscaBase. MolluscaBase. Vesicomidae Dall & Simpson, 1901.  
680 <http://www.marinespecies.org/aphia.php?p=taxdetails&id=23140#distributions>  
681 (2019).
- 682 35. Newton, I. L. G. *et al.* The *Calyptogena magnifica* Chemoautotrophic Symbiont  
683 Genome. *Science* **315**, 998–1000 (2007).
- 684 36. Kuwahara, H. *et al.* Reduced Genome of the Thioautotrophic Intracellular  
685 Symbiont in a Deep-Sea Clam, *Calyptogena okutanii*. *Current Biology* **17**, 881–  
686 886 (2007).
- 687 37. Kuwahara, H. *et al.* Loss of genes for DNA recombination and repair in the  
688 reductive genome evolution of thioautotrophic symbionts of *Calyptogena* clams.  
689 *BMC Evolutionary Biology* **11**, 285 (2011).
- 690 38. Tamas, I. *et al.* 50 Million Years of Genomic Stasis in Endosymbiotic Bacteria.  
691 *Science* **296**, 2376–2379 (2002).

- 692 39. Roeselers, G. *et al.* Complete genome sequence of Candidatus *Ruthia magnifica*.  
693 *Stand Genomic Sci* **3**, 163–173 (2010).
- 694 40. Anantharaman, K., Breier, J. A., Sheik, C. S. & Dick, G. J. Evidence for hydrogen  
695 oxidation and metabolic plasticity in widespread deep-sea sulfur-oxidizing  
696 bacteria. *PNAS* **110**, 330–335 (2013).
- 697 41. Liu, H., Cai, S., Zhang, H. & Vrijenhoek, R. C. Complete mitochondrial genome  
698 of hydrothermal vent clam *Calyptogena magnifica*. *Mitochondrial DNA Part A* **27**,  
699 4333–4335 (2016).
- 700 42. Ozawa, G. *et al.* Updated mitochondrial phylogeny of Pteriomorph and  
701 Heterodont Bivalvia, including deep-sea chemosymbiotic *Bathymodiolus* mussels,  
702 vesicomid clams and the thyasirid clam *Conchocele cf. bisecta*. *Mar Genomics*  
703 **31**, 43–52 (2017).
- 704 43. Yang, M., Gong, L., Sui, J. & Li, X. The complete mitochondrial genome of  
705 *Calyptogena marissinica* (Heterodonta: Veneroidea: Vesicomidae): Insight into  
706 the deep-sea adaptive evolution of vesicomids. *PLoS One* **14**, (2019).
- 707 44. Ip, J. C.-H. *et al.* Host-Endosymbiont Genome Integration in a Deep-Sea  
708 Chemosymbiotic Clam. *Molecular Biology and Evolution* (2020)  
709 doi:10.1093/molbev/msaa241.
- 710 45. Stackebrandt, E. & Goebel, B. M. Taxonomic Note: A Place for DNA-DNA  
711 Reassociation and 16S rRNA Sequence Analysis in the Present Species Definition  
712 in Bacteriology. *International Journal of Systematic and Evolutionary*  
713 *Microbiology*, **44**, 846–849 (1994).
- 714 46. Cohan, F. M. Sexual Isolation and Speciation in Bacteria. *Genetica* **116**, 359–370  
715 (2002).
- 716 47. Fujiwara, Y. *et al.* Phylogenetic characterization of endosymbionts in three  
717 hydrothermal vent mussels: influence on host distributions. *Marine Ecology*  
718 *Progress Series* **208**, 147–155 (2000).
- 719 48. Petersen, J. M. *et al.* Hydrogen is an energy source for hydrothermal vent  
720 symbioses. *Nature* **476**, 176–180 (2011).
- 721 49. Wertheim, J. O., Murrell, B., Smith, M. D., Kosakovsky Pond, S. L. & Scheffler,  
722 K. RELAX: Detecting Relaxed Selection in a Phylogenetic Framework. *Mol Biol*  
723 *Evol* **32**, 820–832 (2015).
- 724 50. Burke, G. R. & Moran, N. A. Massive Genomic Decay in *Serratia symbiotica*, a  
725 Recently Evolved Symbiont of Aphids. *Genome Biol Evol* **3**, 195–208 (2011).
- 726 51. Stewart, F. J., Young, C. R. & Cavanaugh, C. M. Lateral Symbiont Acquisition in  
727 a Maternally Transmitted Chemosynthetic Clam Endosymbiosis. *Mol Biol Evol*  
728 **25**, 673–687 (2008).
- 729 52. Decker, C., Olu, K., Arnaud-Haond, S. & Duperron, S. Physical Proximity May  
730 Promote Lateral Acquisition of Bacterial Symbionts in Vesicomid Clams. *PLoS*  
731 *One* **8**, (2013).
- 732 53. Ozawa, G. *et al.* Ancient occasional host switching of maternally transmitted  
733 bacterial symbionts of chemosynthetic vesicomid clams. *Genome biology and*  
734 *evolution* **9**, 2226–2236 (2017).
- 735 54. Kojima, S. The distribution and the phylogenies of the species of genus  
736 *Calyptogena* and those of vestimentiferans around Japan. *JAMSTEC Journal of*  
737 *Deep-Sea Research* **11**, 243–248 (1995).
- 738 55. Goffredi, S. K. & Barry, J. P. Species-specific variation in sulfide physiology  
739 between closely related Vesicomid clams. *Marine Ecology Progress Series* **225**,  
740 227–238 (2002).



- 741 56. Breusing, C., Johnson, S. B., Vrijenhoek, R. C. & Young, C. R. Host  
742 hybridization as a potential mechanism of lateral symbiont transfer in deep-sea  
743 vesicomid clams. *Molecular Ecology* **28**, 4697–4708 (2019).
- 744 57. Naito, M. & Pawlowska, T. E. Defying Muller’s Ratchet: Ancient Heritable  
745 Endobacteria Escape Extinction through Retention of Recombination and  
746 Genome Plasticity. *mBio* **7**, e02057-15 (2016).
- 747 58. Pérez-Brocal, V. *et al.* A small microbial genome: the end of a long symbiotic  
748 relationship? *Science* **314**, 312–313 (2006).
- 749 59. Koga, R. & Moran, N. A. Swapping symbionts in spittlebugs: evolutionary  
750 replacement of a reduced genome symbiont. *ISME J* **8**, 1237–1246 (2014).
- 751 60. Sudakaran, S., Kost, C. & Kaltenpoth, M. Symbiont Acquisition and Replacement  
752 as a Source of Ecological Innovation. *Trends in Microbiology* **25**, 375–390 (2017).
- 753 61. Chong, R. A. & Moran, N. A. Evolutionary loss and replacement of Buchnera, the  
754 obligate endosymbiont of aphids. *The ISME Journal* **12**, 898 (2018).
- 755 62. Latorre, A. & Manzano□Marín, A. Dissecting genome reduction and trait loss in  
756 insect endosymbionts. *Annals of the New York Academy of Sciences* **1389**, 52–75  
757 (2017).
- 758 63. Saki, M. & Prakash, A. DNA damage related crosstalk between the nucleus and  
759 mitochondria. *Free Radical Biology and Medicine* **107**, 216–227 (2017).
- 760 64. Chu, H. & Mazmanian, S. K. Innate immune recognition of the microbiota  
761 promotes host-microbial symbiosis. *Nature immunology* **14**, 668–675 (2013).
- 762 65. Oldroyd, G. E. Speak, friend, and enter: signalling systems that promote  
763 beneficial symbiotic associations in plants. *Nature Reviews Microbiology* **11**,  
764 252–263 (2013).
- 765 66. Brownlie, J. C., Adamski, M., Slatko, B. & McGraw, E. A. Diversifying selection  
766 and host adaptation in two endosymbiont genomes. *BMC Evolutionary Biology* **7**,  
767 68 (2007).
- 768 67. Dale, C. & Moran, N. A. Molecular Interactions between Bacterial Symbionts and  
769 Their Hosts. *Cell* **126**, 453–465 (2006).
- 770 68. Chong, R. A., Park, H. & Moran, N. A. Genome Evolution of the Obligate  
771 Endosymbiont Buchnera aphidicola. *Mol Biol Evol* (2019)  
772 doi:10.1093/molbev/msz082.
- 773 69. Wagner, G. P. & Gabriel, W. Quantitative Variation in Finite Parthenogenetic  
774 Populations: What Stops Muller’s Ratchet in the Absence of Recombination?  
775 *Evolution* **44**, 715–731 (1990).
- 776 70. Rand, D. M., Haney, R. A. & Fry, A. J. Cytonuclear coevolution: the genomics of  
777 cooperation. *Trends in Ecology & Evolution* **19**, 645–653 (2004).
- 778 71. Fares, M. A., Moya, A. & Barrio, E. Adaptive evolution in GroEL from distantly  
779 related endosymbiotic bacteria of insects. *Journal of Evolutionary Biology* **18**,  
780 651–660 (2005).
- 781 72. Howe, D. K. & Denver, D. R. Muller’s Ratchet and compensatory mutation in  
782 *Caenorhabditis briggsae* mitochondrial genome evolution. *BMC Evolutionary*  
783 *Biology* **8**, 62 (2008).
- 784 73. Castillo, D. M. & Pawlowska, T. E. Molecular Evolution in Bacterial  
785 Endosymbionts of Fungi. *Mol Biol Evol* **27**, 622–636 (2010).
- 786 74. Ohishi, K. *et al.* Long-term Cultivation of the Deep-Sea Clam *Calyptogena*  
787 *okutanii*: Changes in the Abundance of Chemoautotrophic Symbiont, Elemental  
788 Sulfur, and Mucus. *The Biological Bulletin* **230**, 257–267 (2016).
- 789 75. Andrews, S. *et al.* *FastQC*. (2012).

- 790 76. Zerbino, D. R. & Birney, E. Velvet: algorithms for de novo short read assembly  
791 using de Bruijn graphs. *Genome Res.* **18**, 821–829 (2008).
- 792 77. Kears, M. *et al.* Geneious Basic: An integrated and extendable desktop software  
793 platform for the organization and analysis of sequence data. *Bioinformatics* **28**,  
794 1647–1649 (2012).
- 795 78. Langmead, B. & Salzberg, S. L. Fast gapped-read alignment with Bowtie 2. *Nat*  
796 *Meth* **9**, 357–359 (2012).
- 797 79. Li, H. *et al.* The Sequence Alignment/Map format and SAMtools. *Bioinformatics*  
798 **25**, 2078–2079 (2009).
- 799 80. Bankevich, A. *et al.* SPAdes: A New Genome Assembly Algorithm and Its  
800 Applications to Single-Cell Sequencing. *Journal of Computational Biology* **19**,  
801 455–477 (2012).
- 802 81. Hahn, C., Bachmann, L. & Chevreur, B. Reconstructing mitochondrial genomes  
803 directly from genomic next-generation sequencing reads—a baiting and iterative  
804 mapping approach. *Nucleic Acids Res* **41**, e129–e129 (2013).
- 805 82. Tillich, M. *et al.* GeSeq – versatile and accurate annotation of organelle genomes.  
806 *Nucleic Acids Res* **45**, W6–W11 (2017).
- 807 83. Overbeek, R. *et al.* The SEED and the Rapid Annotation of microbial genomes  
808 using Subsystems Technology (RAST). *Nucleic Acids Res* **42**, D206–D214 (2014).
- 809 84. Darling, A. E., Mau, B. & Perna, N. T. progressiveMauve: Multiple Genome  
810 Alignment with Gene Gain, Loss and Rearrangement. *PLoS ONE* **5**, e11147  
811 (2010).
- 812 85. Tesler, G. GRIMM: genome rearrangements web server. *Bioinformatics* **18**, 492–  
813 493 (2002).
- 814 86. Katoh, K. & Standley, D. M. MAFFT Multiple Sequence Alignment Software  
815 Version 7: Improvements in Performance and Usability. *Mol Biol Evol* **30**, 772–  
816 780 (2013).
- 817 87. Guindon, S. *et al.* New Algorithms and Methods to Estimate Maximum-  
818 Likelihood Phylogenies: Assessing the Performance of PhyML 3.0. *Syst Biol* **59**,  
819 307–321 (2010).
- 820 88. Cock, P. J. A. *et al.* Biopython: freely available Python tools for computational  
821 molecular biology and bioinformatics. *Bioinformatics* **25**, 1422–1423 (2009).
- 822 89. Edgar, R. C. MUSCLE: multiple sequence alignment with high accuracy and high  
823 throughput. *Nucleic Acids Res.* **32**, 1792–1797 (2004).
- 824 90. Goldman, N. & Yang, Z. A codon-based model of nucleotide substitution for  
825 protein-coding DNA sequences. *Mol Biol Evol* **11**, 725–736 (1994).
- 826 91. Lemoine, F., Lespinet, O. & Labedan, B. Assessing the evolutionary rate of  
827 positional orthologous genes in prokaryotes using synteny data. *BMC Evol Biol* **7**,  
828 237 (2007).
- 829 92. Larget, B. R., Kotha, S. K., Dewey, C. N. & Ané, C. BUCKY: Gene tree/species  
830 tree reconciliation with Bayesian concordance analysis. *Bioinformatics* **26**, 2910–  
831 2911 (2010).
- 832 93. Kishino, H. & Hasegawa, M. Evaluation of the maximum likelihood estimate of  
833 the evolutionary tree topologies from DNA sequence data, and the branching  
834 order in hominoidea. *J Mol Evol* **29**, 170–179 (1989).
- 835 94. Kosakovsky Pond, S. L., Posada, D., Gravenor, M. B., Woelk, C. H. & Frost, S. D.  
836 W. GARD: a genetic algorithm for recombination detection. *Bioinformatics* **22**,  
837 3096–3098 (2006).

- 838 95. Ronquist, F. *et al.* MrBayes 3.2: Efficient Bayesian Phylogenetic Inference and  
839 Model Choice Across a Large Model Space. *Systematic Biology* **61**, 539–542  
840 (2012).
- 841 96. Warren, D. L., Geneva, A. J. & Lanfear, R. RWTY (R We There Yet): An R  
842 package for examining convergence of Bayesian phylogenetic analyses.  
843 *Molecular Biology and Evolution* msw279 (2017) doi:10.1093/molbev/msw279.
- 844 97. Zhang, Z. *et al.* Codon Deviation Coefficient: a novel measure for estimating  
845 codon usage bias and its statistical significance. *BMC Bioinformatics* **13**, 43  
846 (2012).
- 847 98. Pond, S. L. K., Frost, S. D. W. & Muse, S. V. HyPhy: hypothesis testing using  
848 phylogenies. *Bioinformatics* **21**, 676–679 (2005).
- 849 99. Smith, M. D. *et al.* Less Is More: An Adaptive Branch-Site Random Effects  
850 Model for Efficient Detection of Episodic Diversifying Selection. *Mol Biol Evol*  
851 **32**, 1342–1353 (2015).
- 852 100. Wołodźko, T. *extraDistr: Additional Univariate and Multivariate*  
853 *Distributions*. (2019).
- 854 101. Fisher, S. R. A. Confidence Limits for a Cross-Product Ratio. *Australian*  
855 *Journal of Statistics* **4**, 41–41 (1962).
- 856

857 **Tables**

858 Table 1 Annotation statistics for symbiont and free-living genomes in this study.

859

| Sample name                         | # of contigs (N50 Mbp) | Mean coverage | Genome size (Mbp) | GC % | # of CDS | # of tRNA | # of rRNA | % non-annotated CDS | NCBI Accession number | Reference              |
|-------------------------------------|------------------------|---------------|-------------------|------|----------|-----------|-----------|---------------------|-----------------------|------------------------|
| <i>Ca. V. okutanii</i>              | 1                      | 9             | 1.02              | 32   | 939      | 35        | 3         | 7                   | AP009247              | Kuwahara et al. (2007) |
| <i>Ca. V. soyae</i> (kilmeri)       | 1                      | 110           | 1.02              | 32   | 983      | 36        | 3         | 11                  | CP060686              | this paper             |
| <i>Ca. V. extenta</i>               | 1                      | 137           | 1.02              | 31   | 995      | 36        | 3         | 9                   | CP060685              | this paper             |
| <i>Ca. V. diagonalis</i>            | 1                      | 110           | 1.02              | 31   | 1005     | 36        | 3         | 10                  | CP060680              | this paper             |
| <i>Ca. V. gigas</i>                 | 1                      | 153           | 1.04              | 31   | 979      | 36        | 3         | 10                  | CP060682              | this paper             |
| <i>Ca. R. magnifica</i>             | 1                      | 14            | 1.16              | 34   | 976      | 36        | 3         | 7                   | CP000488              | Newton et al. (2007)   |
| <i>Ca. R. pliocardia</i>            | 1                      | 113           | 1.23              | 37   | 1642     | 36        | 3         | 31                  | CP060688              | this paper             |
| <i>Ca. R. southwardae</i>           | 39 (0.63)              | 159           | 1.59              | 37   | 2035     | 36        | 3         | 28                  | JACRUS00              | this paper             |
| <i>Ca. R. phaseoliformis</i>        | 8 (0.37)               | 118           | 1.53              | 37   | 2210     | 36        | 3         | 39                  | JACRUR00              | this paper             |
| <i>Ca. R. rectimargo</i>            | 1                      | 91            | 1.23              | 37   | 1476     | 37        | 3         | 29                  | CP060684              | this paper             |
| <i>Ca. R. pacifica</i>              | 1                      | 140           | 1.18              | 37   | 1456     | 35        | 3         | 30                  | CP060683              | this paper             |
| <i>Ca. B. thermophilus</i>          | 1                      | 126           | 2.83              | 39   | 2067     | 36        | 3         | 43                  | CP024634              |                        |
| <i>Ca. T. autotrophicus</i> (SUP05) | 1                      | 106           | 1.51              | 39   | 1506     | 35        | 3         | 32                  | CP010552              | Shah and Morris (2015) |

860 Table 2 Overrepresented functional categories for genes exhibiting significant  
861 evidence for episodic diversifying selection

|                            | <b>Overrepresented function</b>        | <b>gene</b>               | <b>reference locus_tag</b> |  |
|----------------------------|----------------------------------------|---------------------------|----------------------------|--|
| <b>Within free-living</b>  | <b>t-RNA biogenesis</b>                | <i>pheS</i>               | Rmag_0643                  |  |
|                            |                                        | <i>tyrS</i>               | Rmag_0132                  |  |
|                            |                                        | <i>valS</i>               | Rmag_0464                  |  |
|                            |                                        | <i>fnt</i>                | Rmag_0785                  |  |
|                            | <b>ribosome assembly</b>               | <i>rplB</i>               | Rmag_0168                  |  |
|                            |                                        | <i>rplO</i>               | Rmag_0184                  |  |
|                            |                                        | <i>rpsM</i>               | Rmag_0187                  |  |
|                            |                                        | <i>rpsS</i>               | Rmag_0169                  |  |
|                            |                                        | <i>dnaJ</i>               | Rmag_0352                  |  |
|                            | <b>protein folding</b>                 | <i>dnaK</i>               | Rmag_0353                  |  |
|                            |                                        | <i>htpG</i>               | Rmag_0493                  |  |
|                            |                                        | <i>clpB</i>               | Rmag_0787                  |  |
|                            |                                        | <i>ccmE</i>               | Rmag_0659                  |  |
|                            | <b>oxidative phosphorylation</b>       | <i>ccmF</i>               | Rmag_0272                  |  |
|                            |                                        | <i>CYTB/petB</i>          | Rmag_0010                  |  |
|                            |                                        | <i>nhd</i>                | Rmag_0224                  |  |
|                            |                                        | <i>soxB</i>               | Rmag_0156                  |  |
|                            | <b>sulfur oxidation</b>                | <i>soxY</i>               | Rmag_0807                  |  |
|                            |                                        | <i>aprM</i>               | Rmag_0086                  |  |
|                            | <b>dissimilatory sulfate reduction</b> | <i>aprAB</i>              | Rmag_0088, Rmag_0087       |  |
| <i>dsrAB</i>               |                                        | Rmag_0870, Rmag_0869      |                            |  |
| <i>rplJ</i>                |                                        | Rmag_0813                 |                            |  |
| <b>bipartition FL-SYMB</b> | <b>ribosomal proteins</b>              | <i>rpsA</i>               | Rmag_0592                  |  |
|                            |                                        | <i>rpsC</i>               | Rmag_0171                  |  |
|                            |                                        | <i>rpsH</i>               | Rmag_0179                  |  |
|                            |                                        | <i>ileS</i>               | Rmag_0340                  |  |
|                            | <b>t-RNA ligases</b>                   | <i>cysS</i>               | Rmag_0097                  |  |
|                            |                                        | <i>thrS</i>               | Rmag_0648                  |  |
|                            |                                        | <i>glyS</i>               | Rmag_0721                  |  |
|                            |                                        | <i>rplC</i>               | Rmag_0165                  |  |
|                            |                                        | <i>rplD</i>               | Rmag_0166                  |  |
|                            |                                        | <i>rplF</i>               | Rmag_0180                  |  |
| <b>within symbionts</b>    | <b>chaperones, ribosomal proteins</b>  | <i>rplL</i>               | Rmag_0812                  |  |
|                            |                                        | <i>rpsC</i>               | Rmag_0171                  |  |
|                            |                                        | <i>rpsP</i>               | Rmag_0990                  |  |
|                            |                                        | <i>glyS</i>               | Rmag_0721                  |  |
|                            |                                        | <i>argS</i>               | Rmag_0079                  |  |
|                            |                                        | <i>aspS</i>               | Rmag_0396                  |  |
|                            |                                        | <i>gltX</i>               | Rmag_0051                  |  |
|                            | <b>and t-RNA ligases</b>               | <i>ileS</i>               | Rmag_0340                  |  |
|                            |                                        | <i>metG</i>               | Rmag_0570                  |  |
|                            |                                        | <i>trpS</i>               | Rmag_0338                  |  |
|                            |                                        | <i>dsrA</i>               | Rmag_0870                  |  |
|                            |                                        | <i>dsrP</i>               | Rmag_0859                  |  |
|                            |                                        | <i>soxB</i>               | Rmag_0156                  |  |
|                            |                                        | <b>sulphur metabolism</b> |                            |  |
|                            |                                        |                           |                            |  |



|                       |                           |                  |                                 |
|-----------------------|---------------------------|------------------|---------------------------------|
|                       |                           | <i>cobB-cbiA</i> | Rmag_0858                       |
|                       | <b>electron</b>           | <i>nuoFG</i>     | Rmag_0242, Rmag_0243            |
|                       | <b>donating/accepting</b> | <i>rnfABC</i>    | Rmag_0139, Rmag_0140, Rmag_0141 |
|                       | <b>reactions</b>          | <i>rnfE</i>      | Rmag_0788                       |
|                       | <b>ammonia</b>            | <i>gltB</i>      | Rmag_0333, Rmag_1018            |
|                       | <b>assimilation</b>       | <i>glnD</i>      | Rmag_0475                       |
| <b>within Clade</b>   | <b>de novo purine and</b> | <i>purO</i>      | Rmag_0969                       |
| <b>II</b>             | <b>pyrimidine</b>         | <i>purL</i>      | Rmag_0837                       |
|                       | <b>biosynthesis</b>       | <i>purA</i>      | Rmag_0531                       |
|                       |                           | <i>purC</i>      | Rmag_0392                       |
|                       |                           | <i>carB</i>      | Rmag_0875                       |
|                       |                           | <i>pyrDII</i>    | Rmag_0963                       |
|                       | <b>carbon fixation</b>    | <i>shmt/glyA</i> | Rmag_0632                       |
|                       |                           | <i>rbcL</i>      | Rmag_0701                       |
|                       |                           | <i>cbbOQ</i>     | Rmag_0699, Rmag_0700            |
|                       | <b>DNA</b>                | <i>ihfB</i>      | Rmag_0591                       |
|                       | <b>recombination and</b>  | <i>yebC</i>      | Rmag_0394                       |
|                       | <b>repair</b>             | <i>pcrA/uvrD</i> | Rmag_0080, Rmag_0320            |
|                       |                           | <i>recJ</i>      | Rmag_0649                       |
|                       |                           | <i>uvrA</i>      | Rmag_0263                       |
| <b>within Clade I</b> | <b>DNA metabolism</b>     | <i>parC</i>      | Rmag_0302                       |
|                       |                           | <i>dnaX</i>      | Rmag_0466                       |
|                       |                           | <i>ihfB</i>      | Rmag_0591                       |
|                       |                           | <i>exoI</i>      | Rmag_0946                       |

---

862

863

864 Table 3 Sampling information and genome accession numbers for taxa in this study

865

| Species                                   | Accession  | Locality <sup>a</sup> | Dive # | Lat     | Long     | Depth (m) | Year |
|-------------------------------------------|------------|-----------------------|--------|---------|----------|-----------|------|
| Clade I                                   |            |                       |        |         |          |           |      |
| <i>Ca. Vesicomysocius okutanii</i>        | AP009247.1 | Sagami Bay            |        | 35.2    | 139.5    | 1157      | 2004 |
| <i>Phreagena okutanii</i> (mtDNA)         | AP014555   | Sagami Bay            |        | 35.0150 | 139.222  | 852       | 2007 |
| <i>Ca. Vesicomysocius soyae</i> (kilmeri) | CP060686   | Monterey Canyon (s)   | V2059  | 36.7762 | -122.084 | 985       | 2001 |
| <i>Phreagena soyoae</i> (mtDNA)           | MT947390   |                       |        |         |          |           |      |
| <i>Ca. Vesicomysocius extenta</i>         | CP060685   | Monterey Canyon (s)   | T406   | 36.6088 | -122.437 | 2889      | 2002 |
| <i>Phreagena extenta</i> (mtDNA)          | MT947388   |                       |        |         |          |           |      |
| <i>Ca. Vesicomysocius diagonalis</i>      | CP060680   | Monterey Canyon (s)   | T488   | 36.2254 | -122.885 | 3455      | 2002 |
| <i>Archivesica diagonalis</i> (mtDNA)     | MT947381   |                       |        |         |          |           |      |
| <i>Ca. Vesicomysocius gigas</i>           | CP060682   | Guaymas Basin (v)     | T548   | 27.3400 | -111.270 | 1754      | 2003 |
| <i>Archivesica gigas</i> (mtDNA)          | MT947383   |                       |        |         |          |           |      |
| Clade II                                  |            |                       |        |         |          |           |      |
| <i>Ca. Ruthia magnifica</i>               | CP000488.1 | East Pacific Rise (v) |        | 9.8505  | -104.300 | 2500      | 2004 |
| <i>"Calypptogena" magnifica</i> (mtDNA)   | KR862368   | East Pacific Rise (v) |        | 20.8305 | -109.103 | 2601      | 2003 |
| <i>Ca. Ruthia pliocardia</i>              | CP060688   | Blake Spur (s)        | A3710  | 32.4948 | -76.185  | 2155      | 2001 |
| <i>Pliocardia</i> sp. Blake Ridge (mtDNA) | MT947391   |                       |        |         |          |           |      |
| <i>Ca. Ruthia southwardae</i>             | JACRUS00   | Logatchev, MAR (v)    | A3133  | 14.7532 | -44.980  | 3038      | 1997 |
| <i>Abyssogena southwardae</i> (mtDNA)     | MT947385   |                       |        |         |          |           |      |
| <i>Ca. Ruthia phaseoliformis</i>          | JACRUR00   | Aleutian Trench (s)   | TVG    | 54.3050 | -157.213 | 3550      | 1996 |
| <i>Abyssogena phaseoliformis</i> (mtDNA)  | MT947384   |                       |        |         |          |           |      |
| <i>Abyssogena phaseoliformis</i> (mtDNA)  | AP014557   | Japan trench          |        | 39.1052 | 143.893  | 5347      | 2009 |
| <i>Ca. Ruthia rectimargo</i>              | CP060684   | Monterey Canyon (s)   | V2338  | 36.6816 | -122.120 | 1540      | 2003 |
| <i>Calypptogena rectimargo</i> (mtDNA)    | MT947387   |                       |        |         |          |           |      |
| <i>Ca. Ruthia pacifica</i>                | CP060683   | Monterey Canyon (s)   | V2555  | 36.7739 | -122.049 | 650       | 2004 |
| <i>Calypptogena pacifica</i> (mtDNA)      | MT947386   |                       |        |         |          |           |      |
| <i>Abyssogena mariana</i> (mtDNA)         | LC126311   | Mariana trench        |        | 11.6569 | 143.049  | 5633      | 2013 |
| "free-living"                             |            |                       |        |         |          |           |      |
| <i>Ca. B. thermophilus</i>                | CP024634   | East Pacific Rise (v) |        | 9.82    | -104.30  | 2518      | 2000 |
| <i>Ca. T autotrophicus</i>                | CP010552   | Effingham Inlet       |        | 49.0369 | -125.208 | 60        | 2013 |

866 Table S6 Assembly and annotation statistics for mitochondrial genomes in this study.

| Sample name                       | # of contigs (N50 Mbp) | Mean coverage | Genome size (Mbp) | GC % | # of CDS | # of tRNA | # of rRNA | NCBI Accession number | Reference          |
|-----------------------------------|------------------------|---------------|-------------------|------|----------|-----------|-----------|-----------------------|--------------------|
| <i>Phreagena okutanii</i>         | 1                      | n.a.          | 16336             | 34   | 13       | 23        | 2         | AP014555              | Ozawa et al (2017) |
| <i>Phreagena soyoae</i>           | 1                      | 25            | 19254             | 34   | 13       | 23        | 2         | MT947390              | this paper         |
| <i>Phreagena extenta</i>          | 1                      | 6             | 18098             | 33   | 13       | 22        | 2         | MT947388              | this paper         |
| <i>Archivesica diagonalis</i>     | 1                      | 8             | 20322             | 33   | 13       | 22        | 2         | MT947381              | this paper         |
| <i>Archivesica gigas</i>          | 1                      | 7             | 15625             | 35   | 13       | 21        | 2         | MT947383              | this paper         |
| <i>“Calypptogena” magnifica*</i>  | 1                      | n.a.          | 19738             | 32   | 13       | 22        | 2         | KR862368              | Liu et al (2016)   |
| <i>Pliocardia</i> sp.             | 1                      | 20            | 18885             | 28   | 13       | 22        | 2         | MT947391              | this paper         |
| <i>Abyssogena southwardae</i>     | 1                      | 15            | 19082             | 29   | 13       | 24        | 2         | MT947385              | this paper         |
| <i>Abyssogena phaseoliformis</i>  | 1                      | 10            | 17997             | 31   | 13       | 23        | 2         | MT947384              | this paper         |
| <i>Abyssogena phaseoliformis*</i> | 1                      | n.a.          | 19424             | 30   | 13       | 24        | 2         | AP014557              | Ozawa et al (2017) |
| <i>Calypptogena rectimargo</i>    | 1                      | 22            | 19326             | 32   | 13       | 25        | 2         | MT947387              | this paper         |
| <i>Calypptogena pacifica</i>      | 1                      | 18            | 19897             | 31   | 13       | 23        | 2         | MT947386              | this paper         |
| <i>Abyssogena mariana</i>         | 1                      | n.a.          | 15927             | 30   | 13       | 23        | 2         | LC126311              | Ozawa et al (2017) |

\*Complete mitogenome

867 **Figures and captions**

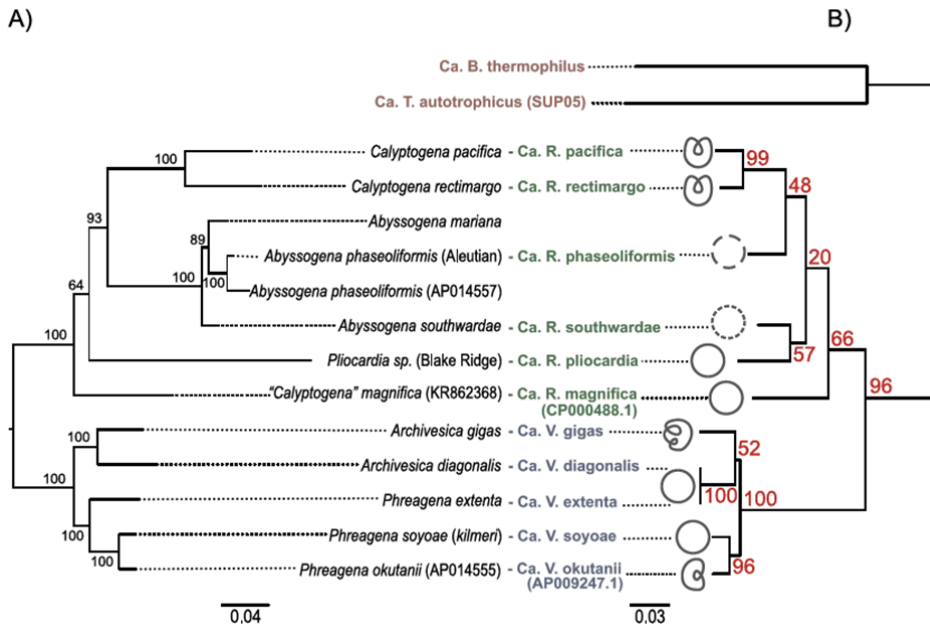

868  
869

870 Figure 1 Host and symbiont phylogenomic estimates. A) Neighbor-joining phylogeny  
871 based on genetic distance (GTR model) between genome-wide alignments of  
872 mitochondrial genomes (15272 bp). Numbers in black are bootstrap values. B)  
873 Neighbor-joining phylogeny based on genetic distance (GTR model) between  
874 genome-wide alignments of symbiont (Clade I; *Ca. Vesicomysocius* in blue, Clade  
875 II; *Ca. Ruthia* in green) and free-living (in red) genomes (761866 bp). Chromosome  
876 schemes showing genome inversions and assembly fragmentation are displayed at the  
877 end of the branches. Refer to text for a description of the genome structures. Numbers  
878 in red are the genome-wide mean covariance factors; they represent the percentage of  
879 protein-coding genes supporting each split of the phylogeny.

880  
881

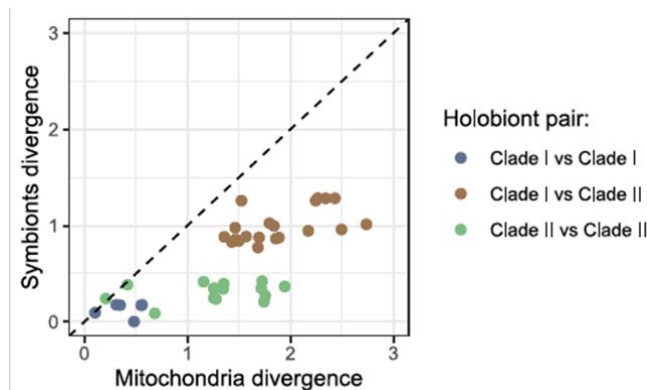

882  
883 Figure 2 Relationship between symbiont and mitochondrial divergence. For each  
884 holobiont pair, host and symbiont divergences are expressed as pairwise synonymous  
885 substitutions rates (dS) in their respective genomes.

886

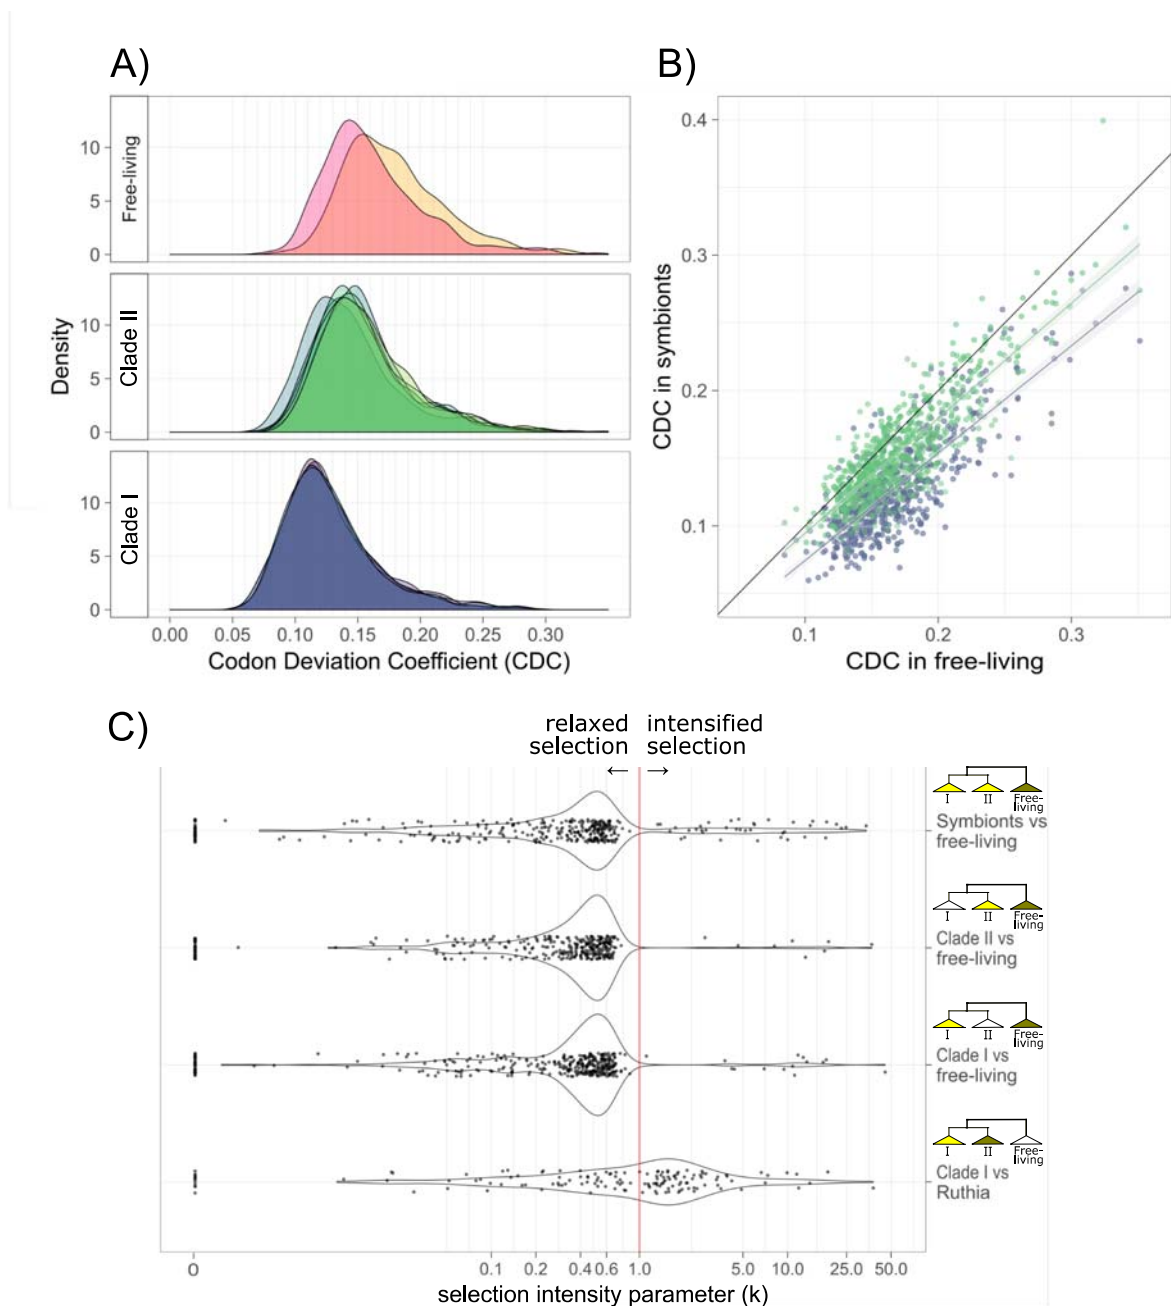

887

888 Figure 3 Codon bias in symbionts and free-living. A) Codon Deviation Coefficient  
889 (CDC) spectra for each genome (all protein-coding genes). Within the free-living,  
890 yellow: *Ca. B. thermophilus*; red: *Ca. T. autotrophicus*. B) Correlation between the  
891 average CDC of free-living, *Ca. Ruthia* (green) and *Ca. Vesicomysocius* (blue) core  
892 genes. Linear regressions are shown. CDC values vary from 0 (no bias) to 1  
893 (maximum bias). C) Selection parameter (k) spectra of genes for which a significant  
894 change in selection was detected by RELAX. Note that k is on a log scale.  
895

896

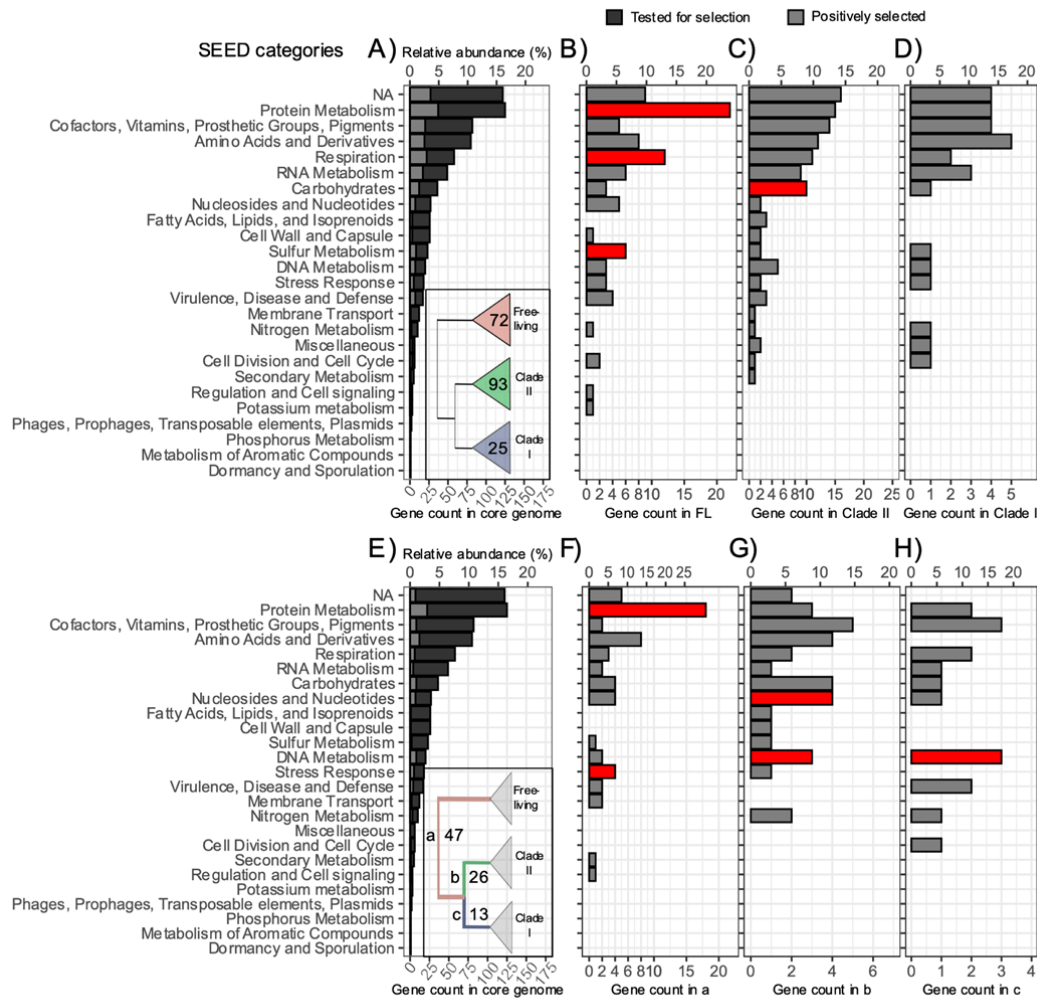

897  
 898 Figure 4 SEED category distribution of core genes under episodic diversifying  
 899 selection within phylogenetic clades (A, B, C, D), and on partitioning branches (C, D,  
 900 E, F). A) Distribution of all non-recombining core genes (dark grey, 652 loci) and loci  
 901 under selection within the free-living, *Ca. Ruthia*, and *Ca. Vesicomysocius* clades  
 902 (light grey, 168 loci). The number of loci selected within each clade is represented in  
 903 the inset. B) Genes under selection within the free-living. C) Genes under selection  
 904 within *Ca. Ruthia*. D) Genes under selection within the *Ca. Vesicomysocius*. E)  
 905 Distribution of all non-recombining core genes (dark grey, 652 loci) and loci under  
 906 selection on all partitioning branches (light grey, 80 loci). The number of loci selected  
 907 on each branch is represented in the inset. F) Genes under selection on branch a. G)  
 908 Genes under selection on branch b. H) Genes under selection on branch c. Note that  
 909 genes may be represented in multiple functional categories and multiple clades or  
 910 branches. SEED categories significantly overrepresented (in red) and  
 911 underrepresented (in blue) in the groups compared to the core genome are highlighted.  
 912 Refer to text for further breakdown of these categories. NA: no functional annotation.



A) Core gene sequences

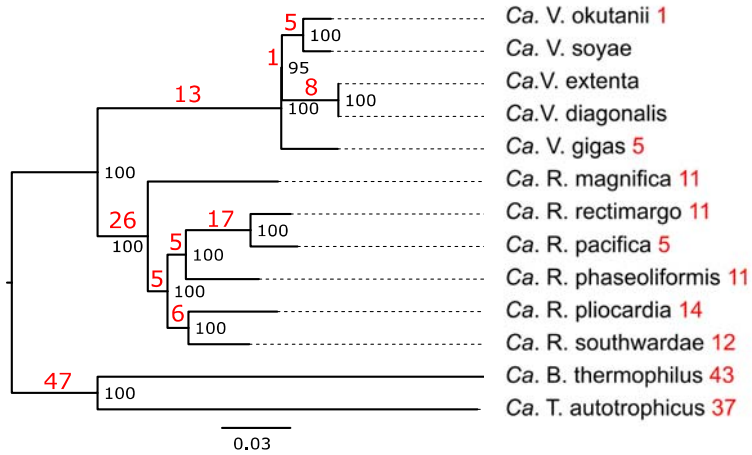

B) Gene conservation pattern

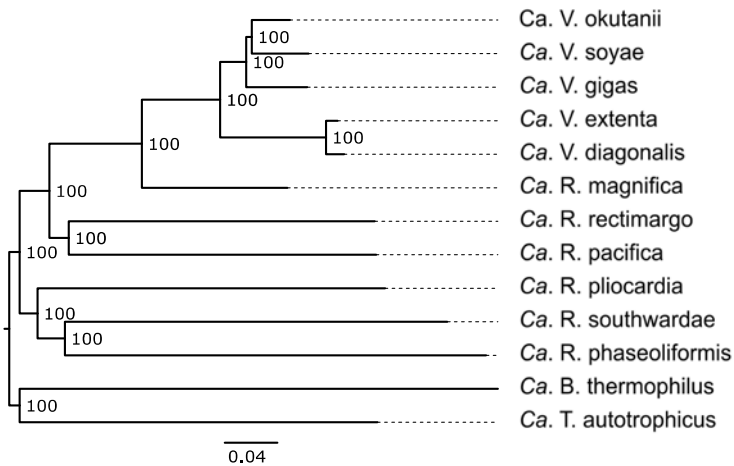

913  
 914 Figure S1 Distance-based neighbour-joining trees established from A) a concatenated  
 915 alignment of 652 non-recombining core protein-coding genes sequences (618342 bp,  
 916 HKY nucleotide substitution model). In red are the number of genes under episodic  
 917 diversifying selection in each branch; B) the presence/absence of positionally  
 918 orthologous genes (Jaccard distance on 6110 genes). Numbers above branches are  
 919 bootstrap support values.

920

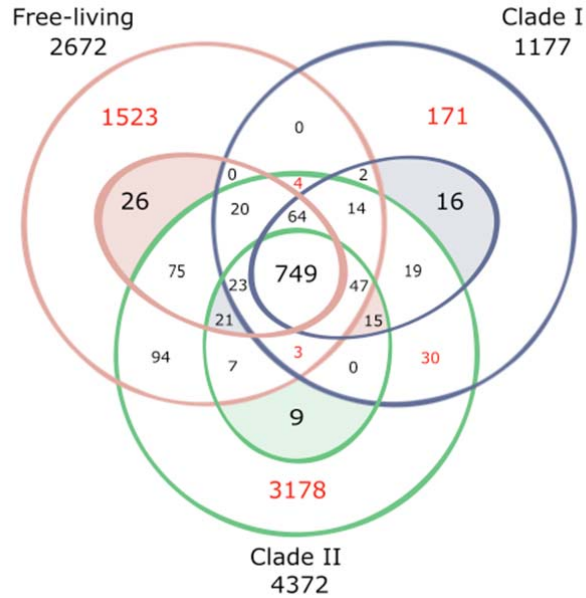

921

922 Figure S2 Venn diagram representing the 6110 unique and shared putative genes  
 923 amongst the free-living, *Ca. Vesicomysocius* and *Ca. Ruthia*. The outer circles  
 924 represent the pan-genome while the inner circles represent the core-genome of the  
 925 groups. Free-living: *Ca. B. thermophilus* and *Ca. T. autotrophicus*); *Ca. Ruthia*: *Ca. R.*  
 926 *magnifica*, *Ca. R. phaseoliformis*, *Ca. R. pacifica*, *Ca. R. rectiomargo*, *Ca. R.*  
 927 *pliocardia*, and *Ca. R. southwardae*; *Ca. Vesicomysocius*: *Ca. V. okutanii*, *Ca. V.*  
 928 *soyoeae*, *Ca. V. diagonalis-extenta*, and *Ca. V. gigas*. Groups in which more than 50%  
 929 of the genes are unannotated are identified in red. The complete orthology is available  
 930 in Table S1.

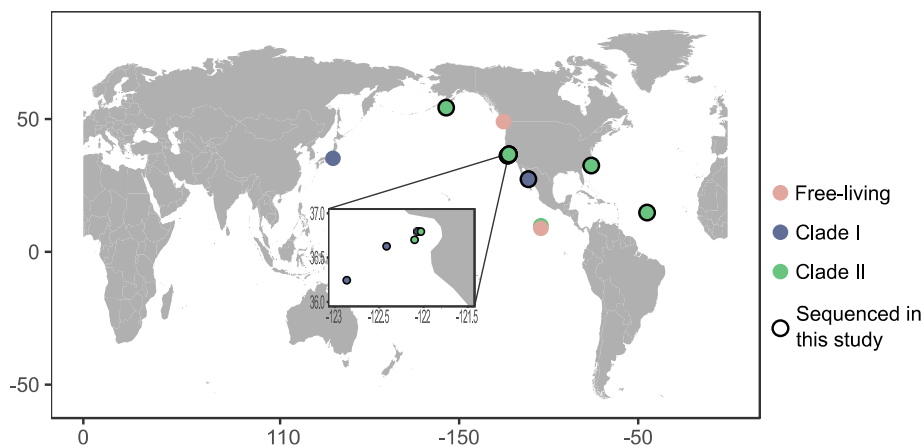

931

932 Figure S3 Sampling locations. Inset depicts samples collected from varying depths in  
 933 Monterey Bay.

934
